# Supplementary material
Source: HighWire-hosted journal article supplement (https://gut.bmj.com/content/gutjnl-2019-319188)
Supplement: inline-supplementary-material-5 [file inline-supplementary-material-5.xls]

## Sheet: HQ-reads-profile
Supplementary Table S3. Quality control and annotation profile of each sample
Sample ID	Subject ID	Category	#Raw_Fw	#Raw_Rv	#HQ_Fw	#HQ_Rv	#Species_mOTU	#Species_Metaphlan2	#KEGG genes	#KO_KEGG gene	#uniref90	#KO_uniref
AHCNC2ADXX.N702_CGTACTAG	10219.Healthy	Control	45480657	45480657	42320637	42320637	162	93	343133	4582	612508	3789
AHCNC2ADXX.N704_TCCTGAGC	10226.Healthy	Control	25814877	25814877	23735323	23735323	141	102	328976	3600	659881	3088
AHCNC2ADXX.N707_CTCTCTAC	10231.Healthy	Control	34373862	34373862	31693904	31693904	151	108	358659	4537	450252	3717
AHCT5GADXX.N702-S501_CGTACTAG-TAGATCGC	10114.Healthy	Control	23274091	23274091	21917701	21917701	116	75	256345	4339	442664	3518
AHCT5JADXX.N708-S501_CAGAGAGG-TAGATCGC	10132.Healthy	Control	15777853	15777853	14326343	14326343	181	118	269068	4369	729805	3743
BHCNJJADXX.N708-S503_CAGAGAGG-TATCCTCT	10207.Healthy	Control	40650797	40650797	38214617	38214617	190	124	536918	4746	605696	4227
BHCNJJADXX.N709-S503_GCTACGCT-TATCCTCT	10208.Healthy	Control	19462656	19462656	17278495	17278495	200	131	335509	4616	590169	3993
BHCNJJADXX.N712-S503_GTAGAGGA-TATCCTCT	10215.Healthy	Control	21063730	21063730	19515291	19515291	179	87	320353	4434	583815	3935
BHCNK3ADXX.N707-S507_CTCTCTAC-AAGGAGTA	10317.Healthy	Control	29135561	29135561	26829383	26829383	131	86	274251	3697	480981	3516
BHCNK3ADXX.N711-S506_AAGAGGCA-ACTGCATA	10302.Healthy	Control	15032606	15032606	13888655	13888655	128	79	250851	4334	398971	3747
BHCNM7ADXX.N702-S511_CGTACTAG-TCTCTCCG	10354.Healthy	Control	16813059	16813059	15517300	15517300	141	86	279022	4338	547361	3704
BHCNM7ADXX.N703-S511_AGGCAGAA-TCTCTCCG	10357.Healthy	Control	24883678	24883678	21834549	21834549	165	102	315198	3607	586134	2963
BHCNM7ADXX.N708-S508_CAGAGAGG-CTAAGCCT	10341.Healthy	Control	38507085	38507085	35846365	35846365	161	95	346183	4408	644658	3382
BHCTGKADXX.N704-S505_TCCTGAGC-GTAAGGAG	10250.Healthy	Control	26571224	26571224	24353160	24353160	202	116	455239	4456	442395	4213
BHCTGKADXX.N705-S505_GGACTCCT-GTAAGGAG	10258.Healthy	Control	42748831	42748831	40170275	40170275	133	78	220109	3332	596076	2741
BHCTGKADXX.N712-S504_GTAGAGGA-AGAGTAGA	10244.Healthy	Control	40396380	40396380	37486019	37486019	156	91	261797	3959	637089	3675
H7Y75BCX2_PG2452_24A2213_H1_L002	10451.Gastrectomy	Gastrectomy	24637885	24637885	23704830	23704830	162	107	338848	3681	666894	3366
H7Y75BCX2_PG2452_25A2215_H1_L002	10455.Gastrectomy	Gastrectomy	25111911	25111911	24317817	24317817	171	110	422063	4639	476838	4116
H7Y75BCX2_PG2452_26A2216_H1_L002	10457.Gastrectomy	Gastrectomy	26272779	26272779	25409431	25409431	153	95	270436	4482	672390	3739
H7Y75BCX2_PG2452_36A2920_H1_L002	10563.Gastrectomy	Gastrectomy	17707685	17707685	16920463	16920463	148	106	382658	4430	509031	3789
H7Y75BCX2_PG2452_37A2921_H1_L002	10574.Gastrectomy	Gastrectomy	21825169	21825169	20739206	20739206	165	97	323820	4207	604695	3800
H7Y75BCX2_PG2452_41A1817_H1_L002	10672.Gastrectomy	Gastrectomy	20633627	20633627	19443102	19443102	122	83	332504	3379	476700	2819
H7Y75BCX2_PG2452_42A1818_H1_L002	10673.Gastrectomy	Gastrectomy	21998293	21998293	19232619	19232619	150	97	293735	4327	677906	3873
H7YLMBCX2_PG2452_07A1620_H1_L002	10112.Gastrectomy	Gastrectomy	21984573	21984573	20923724	20923724	149	101	292941	4417	493595	3591
H7YLMBCX2_PG2452_08A1621_H1_L002	10156.Gastrectomy	Gastrectomy	21927442	21927442	21080417	21080417	143	100	298985	4335	429322	3810
H7YLMBCX2_PG2452_09A2013_H1_L001	10166.Gastrectomy	Gastrectomy	20936406	20936406	17692742	17692742	101	78	170171	3090	676236	2347
H7YLMBCX2_PG2452_10A2015_H1_L001	10167.Gastrectomy	Gastrectomy	20913289	20913289	18830015	18830015	180	120	458061	4587	755279	4061
H7YLMBCX2_PG2452_11A2016_H1_L001	10176.Gastrectomy	Gastrectomy	23471134	23471134	22356554	22356554	193	134	445148	4545	761265	3931
H7YLMBCX2_PG2452_12A2017_H1_L002	10243.Gastrectomy	Gastrectomy	21189521	21189521	18577285	18577285	221	140	415403	4574	581804	4358
H7YLMBCX2_PG2452_14A2018_H1_L002	10319.Gastrectomy	Gastrectomy	19736014	19736014	19031413	19031413	143	103	441905	4407	552135	3770
H7YLMBCX2_PG2452_17A2113_H1_L002	10360.Gastrectomy	Gastrectomy	19323930	19323930	18503796	18503796	156	126	338390	4506	552786	3898
H7YLMBCX2_PG2452_18A2115_H1_L002	10369.Gastrectomy	Gastrectomy	18009563	18009563	17157885	17157885	152	97	220829	3660	193524	3390
H7YLMBCX2_PG2452_19A2116_H1_L002	10395.Gastrectomy	Gastrectomy	22497799	22497799	18754711	18754711	121	59	60266	3515	363028	3526
H7YLMBCX2_PG2452_23A2121_H1_L001	10433.Gastrectomy	Gastrectomy	24755929	24755929	23152090	23152090	124	72	176126	3327	634738	3650
H7YNNBCX2_PG2452_28A2218_H1_L001	10509.Gastrectomy	Gastrectomy	24508186	24508186	23548338	23548338	182	108	356021	3890	689382	3454
H7YNNBCX2_PG2452_31A2913_H1_L001	10538.Gastrectomy	Gastrectomy	19886255	19886255	19095603	19095603	150	105	371158	3575	596613	3274
H7YNNBCX2_PG2452_32A2915_H1_L001	10540.Gastrectomy	Gastrectomy	22875703	22875703	21636542	21636542	181	121	293396	4462	630058	4143
H7YNNBCX2_PG2452_43A1820_H1_L001	10680.Gastrectomy	Gastrectomy	21595693	21595693	20906544	20906544	150	104	380911	4664	611226	3852
H7YNNBCX2_PG2452_45A2313_H1_L002	10690.Gastrectomy	Gastrectomy	23778040	23778040	22685567	22685567	149	110	403361	4444	647261	3873
H7YNNBCX2_PG2452_46A2315_H1_L002	10696.Gastrectomy	Gastrectomy	28558649	28558649	27349183	27349183	176	118	416800	4453	663167	3835
H7YNNBCX2_PG2452_47A2616_H1_L002	10703.Gastrectomy	Gastrectomy	26706680	26706680	25470924	25470924	159	112	449030	4599	624474	3920
H7YNNBCX2_PG2452_48A2617_H1_L002	10742.Gastrectomy	Gastrectomy	23543889	23543889	21650662	21650662	183	117	361472	4874	483649	4129
H7YNNBCX2_PG2452_49A2718_H1_L002	10751.Gastrectomy	Gastrectomy	30957987	30957987	29622262	29622262	170	95	327764	4595	576560	3931
HC2KGBCX2_PG2452_35A2918_H1_L002	10558.Gastrectomy	Gastrectomy	21108091	21108091	20219790	20219790	161	108	303868	4339	633992	3597
HC2KGBCX2_PG2452_38A1813_H1_L002	10599.Gastrectomy	Gastrectomy	29637927	29637927	28038611	28038611	187	110	430812	4676	573109	4659
HC2KGBCX2_PG2452_39A1815_H1_L002	10623.Gastrectomy	Gastrectomy	24070552	24070552	23018995	23018995	168	103	339792	4410	611576	4017
HC2T7BCX2_PG2452_04A1616_H1_L002	10064.Gastrectomy	Gastrectomy	26522189	26522189	24866757	24866757	172	109	353570	4725	490639	4037
HC2T7BCX2_PG2452_16A2021_H1_L002	10337.Gastrectomy	Gastrectomy	20038212	20038212	19111660	19111660	125	73	299783	4439	423071	3880
HC2T7BCX2_PG2452_21A2118_H1_L002	10423.Gastrectomy	Gastrectomy	22839307	22839307	22240953	22240953	151	89	237349	4139	656749	3939
HGK7MADXX_PG0662_21A0307_H3_L002	10463.Healthy	Control	25323086	25323086	23221155	23221155	194	122	421927	4510	515238	3947
HGK7MADXX_PG0662_23A0402_H3_L001	10465.Healthy	Control	23017764	23017764	21469631	21469631	106	74	247143	3435	248331	2470
HGKFCADXX_PG0662_13A0206_H3_L001	10183.Healthy	Control	19087536	19087536	17794917	17794917	86	50	152340	4188	550789	3413
HGKFCADXX_PG0662_169A0903_H3_L001	10519.Healthy	Control	19432693	19432693	18239105	18239105	119	90	323161	4127	559800	3699
HGKMWADXX_PG0662_95A0604_H3_L002	10486.Healthy	Control	26273027	26273027	23718448	23718448	114	71	302111	3545	570481	3538
HGKMWADXX_PG0662_96A0605_H3_L002	10487.Healthy	Control	23364983	23364983	21289614	21289614	157	103	289651	3539	547787	3014
HGKY7ADXX_PG0662_178A0104_H1_L002	10537.Healthy	Control	19675877	19675877	18255033	18255033	225	119	312741	4587	668164	3860
HGKY7ADXX_PG0662_181A0107_H1_L002	10543.Healthy	Control	20596016	20596016	19073574	19073574	182	134	288579	3478	615209	3039
HGKYVADXX_PG0662_105A0705_H3_L001	10501.Gastrectomy	Gastrectomy	20793271	20793271	19355669	19355669	161	97	376789	4575	473273	3863
HGKYWADXX_PG0662_242A0302_H1_L001	10562.Healthy	Control	17346389	17346389	16399813	16399813	126	82	218785	3267	672349	2474
HGVFFBCX2_PG2452_33A2916_H1_L001	10554.Gastrectomy	Gastrectomy	23447416	23447416	11086715	11086715	184	141	334830	4496	660329	3811
HGVFFBCX2_PG2452_51A2721_H1_L001	10782.Gastrectomy	Gastrectomy	35050947	35050947	33977079	33977079	178	110	446512	4605	569599	3959
HGVFFBCX2_PG2452_52A2613_H1_L001	10791.Gastrectomy	Gastrectomy	20387615	20387615	19349014	19349014	115	89	297460	4281	619520	3584
HGVFFBCX2_PG2452_53A2715_H1_L001	10810.Gastrectomy	Gastrectomy	31383113	31383113	29147136	29147136	182	110	337372	4434	641194	3890
HJK7MADXX_PG0783_24A0403_H1_L001	10647.Healthy	Control	21904702	21904702	20347713	20347713	167	98	398356	4554	531693	4035
HJK7NADXX_PG0783_110A0106_H1_L002	10776.Healthy	Control	37443399	37443399	33959999	33959999	158	108	299974	4071	613114	3590
HJK7VADXX_PG0783_44A0717_H1_L001	10684.Healthy	Control	25456486	25456486	23240785	23240785	120	83	290659	3582	417696	3133
HJKFMADXX_PG0783_117A0317_H1_L001	10794.Healthy	Control	19515550	19515550	16688015	16688015	143	75	197546	3232	334419	2880
HJKFMADXX_PG0783_124A0402_H1_L002	10807.Healthy	Control	26582993	26582993	22746816	22746816	125	61	300269	4485	614838	3781
HJKHJADXX_PG0783_52A0117_H1_L001	10698.Healthy	Control	22636590	22636590	18110996	18110996	158	100	327144	4633	356301	3907
HJKHTADXX_PG0783_55A0104_H1_L001	10701.Healthy	Control	22219363	22219363	20443735	20443735	92	51	169267	3253	669048	2167
HJKJ2ADXX_PG0783_06A0106_H1_L002	10618.Healthy	Control	25327804	25327804	22800191	22800191	163	94	417344	4739	545501	4065
HJKJ2ADXX_PG0783_28A0406_H1_L002	10657.Healthy	Control	22251818	22251818	19878826	19878826	138	93	354790	4396	591584	3668
HJKJJADXX_PG0783_14A0207_H1_L001	10632.Healthy	Control	19199761	19199761	17737322	17737322	144	102	352030	4542	325584	3997
HJKJJADXX_PG0783_29A0407_H1_L001	10659.Healthy	Control	42694928	42694928	39876547	39876547	141	80	244219	4305	146689	3682
HJKJJADXX_PG0783_85A0503_H1_L002	10741.Healthy	Control	9208897	9208897	8666467	8666467	131	54	45789	2918	550500	2836
HJKNLADXX_PG0783_82A0407_H1_L002	10733.Healthy	Control	31755285	31755285	29216670	29216670	159	107	324395	4341	338241	3643
HJKTNADXX_PG0783_113A0203_H1_L001	10784.Healthy	Control	27381235	27381235	23365749	23365749	102	61	229936	3994	365828	3531
HJKTNADXX_PG0783_147A0704_H1_L002	10850.Healthy	Control	23452730	23452730	21301935	21301935	140	81	199528	4215	408915	3702
mix1_N701-N505_TAAGGCGA-GTAAGGAG	10036.Healthy	Control	31026529	31026529	29315295	29315295	152	79	205514	4306	432908	3526
mix1_N702-N505_CGTACTAG-GTAAGGAG	10037.Healthy	Control	29876405	29876405	28440378	28440378	131	75	237553	4350	764662	3526
mix1_N702-N506_CGTACTAG-ACTGCATA	10056.Gastrectomy	Gastrectomy	27632171	27632171	25967154	25967154	202	129	488586	4977	796015	4356
mix2_N701-N505_TAAGGCGA-GTAAGGAG	10105.Healthy	Control	27293412	27293412	25467909	25467909	143	88	392460	3701	641221	3443
mix2_N702-N505_CGTACTAG-GTAAGGAG	10106.Healthy	Control	27419318	27419318	25773801	25773801	144	88	329439	4355	257997	3512
mix2_N707-N503_CTCTCTAC-TATCCTCT	10080.Healthy	Control	29496854	29496854	27059422	27059422	193	107	369180	4625	745583	3926
mix2_N707-N504_CTCTCTAC-AGAGTAGA	10104.Gastrectomy	Gastrectomy	26039684	26039684	24331487	24331487	205	130	387610	4695	322593	4071
mix2_N708-N504_CAGAGAGG-AGAGTAGA	10100.Healthy	Control	25555306	25555306	23863524	23863524	148	100	231118	4225	545877	3453
mix20-N703-S501_AGGCAGAA-TAGATCGC	10189.Gastrectomy	Gastrectomy	38578531	38578531	34616881	34616881	179	117	438471	4660	553126	4029
mix20-N704-S501_TCCTGAGC-TAGATCGC	10192.Gastrectomy	Gastrectomy	26038914	26038914	24148802	24148802	157	103	311994	3898	753290	3617
mix20-N707-S501_CTCTCTAC-TAGATCGC	10197.Healthy	Control	24808400	24808400	15509316	15509316	124	64	122582	4021	775635	3399
mix21_mix22-N711-S501_AAGAGGCA-TAGATCGC	10205.Gastrectomy	Gastrectomy	24042964	24042964	22922559	22922559	179	121	348074	4207	328958	3569
mix23_mix24-N703-S503_AGGCAGAA-TATCCTCT	10246.Healthy	Control	22458704	22458704	20652336	20652336	99	53	187450	4248	668929	3453
mix23_mix24-N709-S502_GCTACGCT-CTCTCTAT	10234.Gastrectomy	Gastrectomy	33717120	33717120	31904039	31904039	159	103	323879	4420	556827	3541
mix25_mix26-N710-S503_CGAGGCTG-TATCCTCT	10257.Gastrectomy	Gastrectomy	32231440	32231440	30452534	30452534	154	87	277640	4396	415958	3647
mix29_mix30-N706_TAGGCATG	10291.Gastrectomy	Gastrectomy	28842957	28842957	26519076	26519076	178	119	465108	4604	679417	3852
mix29_mix30-N708_CAGAGAGG	10297.Gastrectomy	Gastrectomy	35628723	35628723	32712275	32712275	145	115	451717	4281	397656	3969
mix29_mix30-N710_CGAGGCTG	10304.Healthy	Control	18971388	18971388	17444276	17444276	135	69	168791	3511	409661	3146
mix3_N704-N506_TCCTGAGC-ACTGCATA	10058.Healthy	Control	34074125	34074125	32518013	32518013	145	100	300470	3784	594534	3529
mix3_N706-N506_TAGGCATG-ACTGCATA	10060.Healthy	Control	29476121	29476121	27535102	27535102	125	77	235068	4289	428083	3665
mix3_N707-N505_CTCTCTAC-GTAAGGAG	10048.Healthy	Control	27692392	27692392	26296274	26296274	177	98	348757	3759	615495	3629
mix31_mix32-N707-S506_CTCTCTAC-ACTGCATA	10340.Healthy	Control	22789042	22789042	16648218	16648218	120	57	208435	3077	409661	2655
mix31_mix32-N708-S506_CAGAGAGG-ACTGCATA	10342.Gastrectomy	Gastrectomy	28137041	28137041	26286869	26286869	168	106	381353	4099	701704	3732
mix33_mix34-N710-S506_CGAGGCTG-ACTGCATA	10355.Gastrectomy	Gastrectomy	35858327	35858327	32277824	32277824	183	121	408349	4363	762529	3553
mix35_mix36-N710-S507_CGAGGCTG-AAGGAGTA	10378.Healthy	Control	23764831	23764831	22597190	22597190	144	81	244872	3644	491200	3230
mix4_N704-N504_TCCTGAGC-AGAGTAGA	10025.Healthy	Control	25529469	25529469	22177541	22177541	145	104	279322	3400	559356	2947
mix5_N702-N507_CGTACTAG-AAGGAGTA	10068.Gastrectomy	Gastrectomy	33040867	33040867	30748650	30748650	169	108	310668	4045	594515	3631
mix6_N703-N505_AGGCAGAA-GTAAGGAG	10107.Healthy	Control	25437380	25437380	23154139	23154139	143	90	180802	3556	331732	2843
Average			28944268	28944268	2.67988e+07	2.67988e+07	150.2	99.2	311236	4285.4	579022	3571
Standard deviation			6.45524e+06	6.45524e+06	6.28653e+06	6.28653e+06	27.6057	20.5352	89769.9	4362.17	583468	439.685
Notes
#: number of
Fw: forward
Rv: reverse
HQ: high quality reads
KEGG: Kyoto Ensiclopedia of Genes and Genomes
KO: KEGG Orthology
