# Supplementary material
Source: HighWire-hosted journal article supplement (https://gut.bmj.com/content/gutjnl-2019-319188)
Supplement: inline-supplementary-material-29 [file inline-supplementary-material-29.xls]

## Sheet: Dumping_syndrome
Supplementary Table S17. Microbiome and metabolome profiles in participants with (n=15) and without (n=32) dumping syndrome
a. Species profiles
mOTU-annotated species	p_value_kw	p_value_FDR		MetaPhlan2-annotated species	p_value_kw	p_value_FDR
Prevotellasalivae	0.000678691	0.236863		Clostridium_symbiosum	0.00310498	0.671617
Bacteroidessp_3_1_19	0.00228934	0.278717		Collinsella_tanakaei	0.012619	0.671617
butyrate_producingbacteriumSS3_4	0.00375013	0.278717		Prevotella_denticola	0.0135658	0.671617
Bacteroidessp_2_1_33B	0.00420088	0.278717		Clostridium_leptum	0.0150515	0.671617
Prevotelladenticola	0.00572796	0.278717		Parabacteroides_distasonis	0.0211886	0.671617
Bacteroidessp_2_1_7	0.00599302	0.278717		Methanobrevibacter_smithii	0.0248863	0.671617
Clostridiumleptum	0.00734036	0.278717		Subdoligranulum_unclassified	0.0284597	0.671617
Clostridiumsymbiosum	0.00883463	0.278717		Lachnospiraceae_bacterium_3_1_57FAA_CT1	0.0299315	0.671617
Fusobacteriumulcerans	0.00895	0.278717		Megasphaera_micronuciformis	0.0306528	0.671617
Lachnospiraceaebacterium3_1_57FAA_CT1	0.00910064	0.278717		Clostridium_clostridioforme	0.0329366	0.671617
Staphylococcusaureus	0.00973753	0.278717		Gemella_haemolysans	0.0423498	0.671617
Prevotellaoris	0.01001	0.278717		Prevotella_histicola	0.0528847	0.671617
Streptococcussanguinis	0.0111702	0.278717		Lactobacillus_mucosae	0.0530738	0.671617
Turicibactersanguinis	0.0111806	0.278717		Turicibacter_sanguinis	0.0530738	0.671617
Parabacteroidessp_D13	0.0127709	0.283276		Prevotella_veroralis	0.0532145	0.671617
Lachnospiraceaebacterium8_1_57FAA	0.0129868	0.283276		Alistipes_putredinis	0.0543904	0.671617
Veillonelladispar	0.0165622	0.340011		Roseburia_inulinivorans	0.0552343	0.671617
Actinomycesviscosus	0.0201262	0.390226		Citrobacter_unclassified	0.0598292	0.671617
Methanobrevibactersmithii	0.0248863	0.420742		Alistipes_sp_AP11	0.0643528	0.671617
Turicibactersp_HGF1	0.0248863	0.420742		Veillonella_unclassified	0.06449	0.671617
Veillonellaatypica	0.0253168	0.420742		Clostridium_nexile	0.076558	0.671617
Bacteroidesthetaiotaomicron	0.0301535	0.478344		Lactobacillus_reuteri	0.076558	0.671617
Alistipesputredinis	0.0336992	0.486765		Alistipes_shahii	0.077443	0.671617
Bacteroidessp_4_3_47FAA	0.0352327	0.486765		Lachnospiraceae_bacterium_8_1_57FAA	0.077548	0.671617
Acidaminococcusfermentans	0.0365131	0.486765		Gemella_unclassified	0.08308	0.671617
Fusobacteriumvarium	0.0368048	0.486765		Atopobium_parvulum	0.0860096	0.671617
Klebsiellavariicola	0.037658	0.486765		Veillonella_atypica	0.0912463	0.671617
Campylobactergracilis	0.0412778	0.514498		Fusobacterium_nucleatum	0.0920828	0.671617
Roseburiainulinivorans	0.0446097	0.536855		Streptococcus_sanguinis	0.0987259	0.671617
Alistipessp_HGB5	0.0546434	0.635685		Coprococcus_comes	0.100572	0.671617
Bacteroidesclarus	0.0614288	0.657453		Abiotrophia_defectiva	0.101095	0.671617
Parabacteroidesdistasonis	0.0639493	0.657453		Prevotella_melaninogenica	0.101095	0.671617
Selenomonasflueggei	0.0643528	0.657453		Klebsiella_pneumoniae	0.103958	0.671617
Streptococcussp_2_1_36FAA	0.0643664	0.657453		Clostridium_hathewayi	0.106697	0.671617
Neisseriaelongata	0.0659336	0.657453		Phascolarctobacterium_succinatutens	0.107552	0.671617
Streptococcussp_C300	0.0726536	0.661717		Acidaminococcus_fermentans	0.109834	0.671617
Bacteroidessp_1_1_14	0.0750599	0.661717		Enterobacter_aerogenes	0.109834	0.671617
Lactobacillusreuteri	0.076558	0.661717		Methanobrevibacter_unclassified	0.109834	0.671617
Sorangiumcellulosum	0.076558	0.661717		Turicibacter_unclassified	0.109834	0.671617
Collinsellaaerofaciens	0.0788707	0.661717		Ruminococcus_torques	0.115325	0.671617
Megasphaeramicronuciformis	0.0818531	0.661717		Roseburia_intestinalis	0.117613	0.671617
Coprococcuscatus	0.0828004	0.661717		Streptococcus_thermophilus	0.11763	0.671617
Coprococcuscomes	0.0836422	0.661717		Dialister_invisus	0.118812	0.671617
Citrobacteryoungae	0.0840987	0.661717		Ruminococcus_obeum	0.120691	0.671617
Lachnospiraceaebacterium3_1_46FAA	0.0862233	0.661717		Megasphaera_unclassified	0.120693	0.671617
Veillonellasp_oraltaxon158	0.0890799	0.661717		Bacteroides_faecis	0.122597	0.671617
Bacteroideseggerthii	0.0891137	0.661717		Fusobacterium_periodonticum	0.134799	0.711581
Bacteroidessp_1_1_6	0.0957155	0.695932		Akkermansia_muciniphila	0.143189	0.711581
Dialisterinvisus	0.10396	0.721344		Ruminococcaceae_bacterium_D16	0.144471	0.711581
Veillonellasp_6_1_27	0.105118	0.721344		Slackia_piriformis	0.145574	0.711581
Bacteroidessp_9_1_42FAA	0.107613	0.721344		Veillonella_dispar	0.157035	0.711581
Eggerthellasp_YY7918	0.109834	0.721344		Lactobacillus_vaginalis	0.15721	0.711581
Haemophilusinfluenzae	0.118324	0.721344		Clostridium_bartlettii	0.158906	0.711581
Bacteroidesdorei	0.120315	0.721344		Lachnospiraceae_bacterium_7_1_58FAA	0.159424	0.711581
Veillonellasp_3_1_44	0.12614	0.721344		Pseudoflavonifractor_capillosus	0.163284	0.711581
Klebsiellapneumoniae	0.130162	0.721344		Coprococcus_catus	0.165929	0.711581
Rothiamucilaginosa	0.13138	0.721344		Oscillibacter_unclassified	0.166936	0.711581
Alistipesshahii	0.131895	0.721344		Streptococcus_sobrinus	0.170689	0.711581
Roseburiaintestinalis	0.134565	0.721344		Collinsella_aerofaciens	0.170904	0.711581
Actinobacillusureae	0.134799	0.721344		Granulicatella_unclassified	0.172436	0.711581
Actinomycessp_oraltaxon175	0.136356	0.721344		Coprobacter_fastidiosus	0.176509	0.711581
Phascolarctobacteriumsuccinatutens	0.138471	0.721344		Bifidobacterium_longum	0.176638	0.711581
Bacteroidesovatus	0.144127	0.721344		Bilophila_unclassified	0.177895	0.711581
Lachnospiraceaebacterium1_4_56FAA	0.144497	0.721344		Bacteroides_eggerthii	0.185459	0.714092
Bacteroidessp_3_1_40A	0.147896	0.721344		Butyricimonas_synergistica	0.186238	0.714092
Bacteroidesxylanisolvens	0.150452	0.721344		Enterococcus_faecium	0.187024	0.714092
Lachnospiraceaebacterium1_1_57FAA	0.151478	0.721344		Lachnospiraceae_bacterium_3_1_46FAA	0.196389	0.738657
Clostridiumspiroforme	0.151899	0.721344		Bacteroides_stercoris	0.203127	0.752764
Clostridiumsp_SS2_1	0.152695	0.721344		Lachnospiraceae_bacterium_1_1_57FAA	0.213158	0.76832
butyrate_producingbacteriumSSC_2	0.154436	0.721344		Blautia_hydrogenotrophica	0.225618	0.76832
Meiothermussilvanus	0.15721	0.721344		Eubacterium_cylindroides	0.225618	0.76832
Pseudomonasaeruginosa	0.15721	0.721344		Eubacterium_sp_3_1_31	0.225618	0.76832
Lactobacillusparacasei	0.159408	0.721344		Gemella_morbillorum	0.225618	0.76832
Selenomonassputigena	0.160616	0.721344		Lactobacillus_delbrueckii	0.225618	0.76832
Oribacteriumsinus	0.161081	0.721344		Bacteroides_xylanisolvens	0.237615	0.789354
Enterobactercancerogenus	0.16158	0.721344		Stomatobaculum_longum	0.238081	0.789354
Shigellaflexneri	0.16158	0.721344		Bacteroides_finegoldii	0.243705	0.789354
Bifidobacteriumbreve	0.162791	0.721344		Eubacterium_eligens	0.244324	0.789354
Blautiahydrogenotrophica	0.163284	0.721344		Enterococcus_faecalis	0.250086	0.797741
Bacteroidessp_2_1_56FAA	0.165603	0.722444		Bacteroides_thetaiotaomicron	0.253833	0.799574
Streptococcusagalactiae	0.172433	0.722777		Lactobacillus_oris	0.269018	0.836946
Anaerotruncuscolihominis	0.172436	0.722777		Veillonella_parvula	0.273308	0.839844
Shigellasonnei	0.174065	0.722777		Eggerthella_lenta	0.278304	0.839844
Prevotellamelaninogenica	0.174913	0.722777		Pyramidobacter_piscolens	0.279948	0.839844
Clostridiumbolteae	0.178146	0.722777		Streptococcus_intermedius	0.292684	0.842712
Pyramidobacterpiscolens	0.180177	0.722777		Rothia_mucilaginosa	0.300399	0.842712
Shigelladysenteriae	0.180177	0.722777		Streptococcus_lutetiensis	0.306188	0.842712
Clostridiummethylpentosum	0.183755	0.725509		Streptococcus_anginosus	0.312205	0.842712
Cronobacterturicensis	0.187024	0.725509		Roseburia_hominis	0.315246	0.842712
Eubacteriumeligens	0.189422	0.725509		Ruminococcus_callidus	0.32201	0.842712
Clostridiumsp_D5	0.190884	0.725509		Citrobacter_freundii	0.325166	0.842712
Bifidobacteriumlongum	0.192591	0.725509		Alloscardovia_omnicolens	0.325695	0.842712
Citrobactersp_30_2	0.196508	0.725509		Bacteroidales_bacterium_ph8	0.326121	0.842712
Bacteroidessp_2_2_4	0.199676	0.725509		Actinomyces_graevenitzii	0.327721	0.842712
Eubacteriumlimosum	0.200844	0.725509		Bacteroides_coprophilus	0.327721	0.842712
Filifactoralocis	0.200844	0.725509		Bifidobacterium_catenulatum	0.327721	0.842712
Streptococcusdownei	0.201646	0.725509		Butyricicoccus_pullicaecorum	0.327721	0.842712
Streptococcusaustralis	0.209354	0.729816		Granulicatella_elegans	0.327721	0.842712
Klebsiellasp_1_1_55	0.211305	0.729816		Faecalibacterium_prausnitzii	0.337803	0.859863
Neisseriasubflava	0.213658	0.729816		Granulicatella_adiacens	0.341356	0.860218
Lachnospiraceaebacterium5_1_57FAA	0.219651	0.729816		Haemophilus_influenzae	0.365367	0.89191
Bacillussubtilis	0.222523	0.729816		Bifidobacterium_dentium	0.365562	0.89191
Bacteroidespectinophilus	0.225618	0.729816		Barnesiella_intestinihominis	0.36636	0.89191
Lactobacillussanfranciscensis	0.225618	0.729816		Streptococcus_agalactiae	0.370326	0.89191
Parvimonassp_oraltaxon393	0.225618	0.729816		Dorea_formicigenerans	0.379115	0.89191
Slackiaheliotrinireducens	0.225618	0.729816		Klebsiella_unclassified	0.386583	0.89191
Bilophilawadsworthia	0.226181	0.729816		Paraprevotella_clara	0.387757	0.89191
Ruminococcussp_5_1_39BFAA	0.22645	0.729816		Escherichia_coli	0.388148	0.89191
Streptococcusmacedonicus	0.230407	0.729816		Campylobacter_concisus	0.389214	0.89191
RuminococcaceaebacteriumD16	0.23234	0.729816		Bacteroides_vulgatus	0.403704	0.89191
Streptococcusgordonii	0.234574	0.729816		Prevotella_buccae	0.406374	0.89191
Bacteroidessp_3_1_23	0.234859	0.729816		Clostridium_citroniae	0.408317	0.89191
Actinomycessp_oraltaxon448	0.238393	0.729816		Rothia_unclassified	0.413145	0.89191
Collinsellastercoris	0.238393	0.729816		Alistipes_unclassified	0.422807	0.89191
Acidaminococcusintestini	0.243606	0.739292		Mitsuokella_unclassified	0.422807	0.89191
Clostridiumbartlettii	0.249343	0.73966		Acidaminococcus_intestini	0.425358	0.89191
Enterococcusfaecalis	0.250086	0.73966		Bacteroides_dorei	0.437041	0.89191
Fusobacteriummortiferum	0.250086	0.73966		Clostridium_bolteae	0.437731	0.89191
Lactobacillusoris	0.271084	0.765415		Clostridiales_bacterium_1_7_47FAA	0.444179	0.89191
Oxalobacterformigenes	0.279948	0.765415		Lactobacillus_salivarius	0.445092	0.89191
Gemellahaemolysans	0.287379	0.765415		Bifidobacterium_bifidum	0.448127	0.89191
Bifidobacteriumdentium	0.288105	0.765415		Gemella_sanguinis	0.448127	0.89191
Anaerostipessp_3_2_56FAA	0.288722	0.765415		Lachnospiraceae_bacterium_5_1_57FAA	0.450603	0.89191
Eggerthellalenta	0.296327	0.765415		Eubacterium_rectale	0.45717	0.89191
Pseudoflavonifractorcapillosus	0.298599	0.765415		Bifidobacterium_adolescentis	0.468774	0.89191
Campylobacterconcisus	0.300297	0.765415		Haemophilus_parainfluenzae	0.471762	0.89191
Bacteroidesstercoris	0.301335	0.765415		Lachnospiraceae_bacterium_1_4_56FAA	0.474745	0.89191
Streptococcussp_oraltaxon071	0.302747	0.765415		Erysipelotrichaceae_bacterium_21_3	0.474925	0.89191
Lachnospiraceaebacterium5_1_63FAA	0.30429	0.765415		Eubacterium_biforme	0.476094	0.89191
Streptococcusoralis	0.30429	0.765415		Streptococcus_mutans	0.476094	0.89191
Ruminococcusobeum	0.30443	0.765415		Fusobacterium_ulcerans	0.479405	0.89191
Bifidobacteriumcatenulatum	0.309085	0.765415		Megamonas_hypermegale	0.479405	0.89191
Subdoligranulumvariabile	0.312477	0.765415		Roseburia_unclassified	0.479405	0.89191
Streptococcusanginosus	0.315022	0.765415		Lachnospiraceae_bacterium_5_1_63FAA	0.488954	0.89191
Burkholderialesbacterium1_1_47	0.315251	0.765415		Bilophila_wadsworthia	0.492545	0.89191
Prevotellabuccae	0.32201	0.765415		Bacteroides_ovatus	0.493513	0.89191
Salmonellaenterica	0.32201	0.765415		Lachnospiraceae_bacterium_9_1_43BFAA	0.493563	0.89191
Bacteroidessp_3_2_5	0.322686	0.765415		Streptococcus_gordonii	0.495064	0.89191
Capnocytophagasp_oraltaxon329	0.322868	0.765415		Peptostreptococcus_stomatis	0.495709	0.89191
Coprobacillussp_29_1	0.322919	0.765415		Ruminococcus_lactaris	0.495709	0.89191
Clostridiumramosum	0.32425	0.765415		Prevotella_copri	0.499045	0.89191
Parascardoviadenticolens	0.325025	0.765415		Streptococcus_tigurinus	0.504055	0.89452
Megasphaeraelsdenii	0.325091	0.765415		Streptococcus_cristatus	0.51233	0.902847
Neisseriagonorrhoeae	0.325166	0.765415		Brachyspira_unclassified	0.522449	0.914285
Blautiahansenii	0.327721	0.765415		Anaerotruncus_colihominis	0.534147	0.917495
Clostridiumbutyricum	0.327721	0.765415		Bacteroides_nordii	0.534847	0.917495
Peptoniphilussp_oraltaxon836	0.327721	0.765415		Parabacteroides_johnsonii	0.548487	0.917495
Prevotellabuccalis	0.327721	0.765415		Parasutterella_excrementihominis	0.548487	0.917495
Thermusscotoductus	0.327721	0.765415		Bifidobacterium_breve	0.55055	0.917495
Eubacteriumbiforme	0.330113	0.765415		Clostridiaceae_bacterium_JC118	0.55055	0.917495
Lautropiamirabilis	0.33219	0.765415		Haemophilus_sputorum	0.553518	0.917495
Bacteroidesfinegoldii	0.337524	0.765415		Erysipelotrichaceae_bacterium_3_1_53	0.55705	0.917495
Ruminococcustorques	0.337664	0.765415		Pantoea_unclassified	0.55705	0.917495
Bacteroidesvulgatus	0.337748	0.765415		Alistipes_senegalensis	0.564633	0.923945
Eubacteriumsiraeum	0.346328	0.766621		Atopobium_rimae	0.601119	0.963503
Bacteroidessp_20_3	0.349292	0.766621		Blautia_producta	0.601684	0.963503
Haemophilusparainfluenzae	0.349431	0.766621		Pseudomonas_unclassified	0.601684	0.963503
Bacteroidescoprophilus	0.355119	0.766621		Gordonibacter_pamelaeae	0.608889	0.963503
Acidaminococcussp_D21	0.355465	0.766621		Acidaminococcus_unclassified	0.609847	0.963503
Bifidobacteriumadolescentis	0.357305	0.766621		Eubacterium_brachy	0.612645	0.963503
Enterobactersp_638	0.360779	0.766621		Eubacterium_hallii	0.615571	0.963503
Faecalibacteriumprausnitzii	0.36131	0.766621		Ruminococcus_bromii	0.620481	0.965193
Streptococcusthermophilus	0.36131	0.766621		Streptococcus_mitis_oralis_pneumoniae	0.631203	0.975393
Bordetellabronchiseptica	0.365367	0.766621		Ruminococcus_sp_5_1_39BFAA	0.638554	0.975393
Shigellasp_D9	0.365367	0.766621		Actinomyces_odontolyticus	0.63865	0.975393
Shuttleworthiasatelles	0.365367	0.766621		Bacteroides_uniformis	0.648077	0.981221
Granulicatellaadiacens	0.366858	0.766621		Burkholderiales_bacterium_1_1_47	0.651618	0.981221
Bacteroidesfragilis	0.369557	0.766621		Clostridium_perfringens	0.655671	0.981221
Bacteroidesintestinalis	0.371775	0.766621		Streptococcus_infantis	0.661205	0.981221
Veillonellaparvula	0.373426	0.766621		Clostridium_asparagiforme	0.661935	0.981221
Bacteroidescoprocola	0.376313	0.766772		Holdemania_filiformis	0.666526	0.982249
Prevotelladentalis	0.378508	0.766772		Erysipelotrichaceae_bacterium_2_2_44A	0.698857	0.988004
Neisseriameningitidis	0.380802	0.766772		Coprococcus_sp_ART55_1	0.701438	0.988004
Fusobacteriumperiodonticum	0.382287	0.766772		Bacteroides_coprocola	0.703779	0.988004
Enterococcusfaecium	0.396042	0.788519		Megamonas_funiformis	0.706021	0.988004
Prevotellacopri	0.399178	0.788519		Bacteroides_clarus	0.712114	0.988004
Bacteroidessp_2_1_16	0.399908	0.788519		Enterococcus_casseliflavus	0.717034	0.988004
Coprobacillussp_D7	0.408683	0.800878		Bifidobacterium_pseudocatenulatum	0.719028	0.988004
Escherichiacoli	0.411043	0.800878		Parabacteroides_goldsteinii	0.726879	0.988004
Lachnospiraceaebacterium4_1_37FAA	0.415539	0.800878		Lachnospiraceae_bacterium_2_1_58FAA	0.734499	0.988004
Shigellaboydii	0.417611	0.800878		Enterobacter_cloacae	0.734884	0.988004
Neisseriaflavescens	0.41765	0.800878		Scardovia_wiggsiae	0.734884	0.988004
Anaerofustisstercorihominis	0.422807	0.801955		Eggerthella_unclassified	0.735939	0.988004
Cronobactersakazakii	0.422807	0.801955		Streptococcus_australis	0.73781	0.988004
Bifidobacteriumbifidum	0.431795	0.814024		Holdemania_unclassified	0.73922	0.988004
Catonellamorbi	0.433835	0.814024		Megamonas_rupellensis	0.741359	0.988004
Ruminococcusbromii	0.43705	0.815122		Dorea_unclassified	0.753768	0.988004
Neisseriasp_oraltaxon014	0.439092	0.815122		Alistipes_indistinctus	0.754311	0.988004
Eubacteriumrectale	0.45092	0.832652		Alistipes_onderdonkii	0.764288	0.988004
Streptococcusequinus	0.460159	0.845239		Eubacterium_siraeum	0.765837	0.988004
Streptococcusmitis	0.479221	0.860709		Prevotella_stercorea	0.765837	0.988004
Actinomycessp_oraltaxon170	0.479389	0.860709		Streptococcus_salivarius	0.766702	0.988004
Doreaformicigenerans	0.485947	0.860709		Bacteroides_massiliensis	0.770712	0.988004
Prevotellaveroralis	0.488994	0.860709		Erysipelotrichaceae_bacterium_6_1_45	0.777251	0.988004
Streptococcusperoris	0.490792	0.860709		Megasphaera_elsdenii	0.777251	0.988004
Roseburiahominis	0.493513	0.860709		Odoribacter_unclassified	0.777251	0.988004
Clostridiumsp_7_2_43FAA	0.493563	0.860709		Klebsiella_oxytoca	0.782294	0.988004
Peptoniphiluslacrimalis	0.493563	0.860709		Bacteroides_caccae	0.783457	0.988004
Eubacteriumcylindroides	0.495104	0.860709		Parabacteroides_merdae	0.784069	0.988004
Pseudoramibacteralactolyticus	0.495104	0.860709		Dorea_longicatena	0.78413	0.988004
Enterobacterasburiae	0.495709	0.860709		Parvimonas_unclassified	0.798653	0.995307
Lactobacillussalivarius	0.507697	0.867414		Lactobacillus_fermentum	0.799513	0.995307
Eggerthellasp_1_3_56FAA	0.513617	0.867414		Oxalobacter_formigenes	0.807254	0.995307
Fusobacteriumnucleatum	0.515943	0.867414		Haemophilus_haemolyticus	0.810728	0.995307
Gemellasanguinis	0.515943	0.867414		Anaerostipes_caccae	0.813624	0.995307
Coprococcuseutactus	0.516851	0.867414		Anaerostipes_unclassified	0.813624	0.995307
Gemellamorbillorum	0.516851	0.867414		Flavonifractor_plautii	0.83334	1
Lactobacillusvaginalis	0.516969	0.867414		Fusobacterium_mortiferum	0.844	1
Eubacteriumhallii	0.530148	0.873372		Paraprevotella_unclassified	0.847172	1
Eubacteriumsaphenum	0.53043	0.873372		Solobacterium_moorei	0.848299	1
Neisseriapolysaccharea	0.531085	0.873372		Bacteroides_cellulosilyticus	0.852756	1
Bifidobacteriumsp_12_1_47BFAA	0.531687	0.873372		Bacteroides_salyersiae	0.853614	1
Solobacteriummoorei	0.536353	0.873372		Coprobacillus_unclassified	0.863099	1
Citrobacterkoseri	0.543268	0.873372		Eubacterium_ramulus	0.863449	1
Streptococcusmutans	0.544348	0.873372		Bacteroides_plebeius	0.866097	1
Lactobacillusdelbrueckii	0.54462	0.873372		Peptostreptococcus_unclassified	0.868031	1
Streptococcussp_C150	0.54492	0.873372		Streptococcus_constellatus	0.868031	1
Actinomycessp_oraltaxon848	0.55055	0.873372		Adlercreutzia_equolifaciens	0.868714	1
Collinsellaintestinalis	0.55055	0.873372		Bacteroides_intestinalis	0.873538	1
Weissellacibaria	0.55055	0.873372		Peptostreptococcaceae_noname_unclassified	0.879417	1
Neisseriacinerea	0.55705	0.879686		Oribacterium_sinus	0.902465	1
Escherichiafergusonii	0.560863	0.881716		Desulfovibrio_desulfuricans	0.906014	1
Selenomonassp_oraltaxon149	0.565998	0.882943		Mitsuokella_multacida	0.914227	1
Lactobacillusgasseri	0.571343	0.882943		Neisseria_unclassified	0.920586	1
Clostridiumsp_L2_50	0.571484	0.882943		Parabacteroides_unclassified	0.920586	1
Peptostreptococcusstomatis	0.571762	0.882943		Anaerostipes_hadrus	0.924749	1
Akkermansiamuciniphila	0.576706	0.883621		Odoribacter_splanchnicus	0.926291	1
Desulfovibriodesulfuricans	0.580494	0.883621		Streptococcus_vestibularis	0.926799	1
Eikenellacorrodens	0.580494	0.883621		Catenibacterium_mitsuokai	0.932532	1
Propionibacteriumacnes	0.582329	0.883621		Megamonas_unclassified	0.937262	1
Lactococcuslactis	0.587771	0.886189		Odoribacter_laneus	0.937262	1
Nakamurellamultipartita	0.594048	0.886189		Ruminococcus_gnavus	0.942814	1
Streptococcussp_oraltaxon056	0.594509	0.886189		Sutterella_wadsworthensis	0.944511	1
Lachnospiraceaebacterium2_1_46FAA	0.601684	0.886189		Escherichia_unclassified	0.945065	1
Lactobacillussakei	0.601684	0.886189		Lactobacillus_gasseri	0.956898	1
Ruminococcuschampanellensis	0.601684	0.886189		Bacillus_subtilis	0.957051	1
Porphyromonasgingivalis	0.608889	0.886189		Alistipes_finegoldii	0.961259	1
Actinomycessp_oraltaxon180	0.609847	0.886189		Eubacterium_ventriosum	0.963205	1
Prevotellapallens	0.609924	0.886189		Streptococcus_parasanguinis	0.96359	1
Actinomycesodontolyticus	0.615039	0.886189		Lactobacillus_casei_paracasei	0.968607	1
Streptococcussalivarius	0.615612	0.886189		Desulfovibrio_piger	0.97349	1
Clostridiumsp_HGF2	0.619981	0.886189		Rothia_dentocariosa	0.97349	1
Haemophilushaemolyticus	0.623441	0.886189		Clostridium_ramosum	0.976241	1
Escherichiaalbertii	0.623893	0.886189		Paraprevotella_xylaniphila	0.989417	1
Prevotellanigrescens	0.623893	0.886189		Anaerotruncus_unclassified	1	1
Lactobacilluscrispatus	0.625593	0.886189		Bacteroides_fragilis	1	1
Bacteroidesfluxus	0.627188	0.886189		Bifidobacterium_animalis	1	1
Ruminococcussp_SR1_5	0.639555	0.90002		Clostridium_sp_ATCC_BAA_442	1	1
Streptococcuspneumoniae	0.647544	0.902569		Lactobacillus_crispatus	1	1
Parabacteroidesmerdae	0.648039	0.902569		Lactococcus_lactis	1	1
Aggregatibacteraphrophilus	0.653668	0.902569		Parvimonas_micra	1	1
Leptotrichiahofstadii	0.654368	0.902569		Raoultella_ornithinolytica	1	1
Neisseriasicca	0.655671	0.902569		Finegoldia_magna
Haemophiluspittmaniae	0.656884	0.902569		Fusobacterium_varium
Eggerthellasp_HGA1	0.663888	0.908616
Bacteroidessp_1_1_30	0.680736	0.912228
Streptococcuspseudopneumoniae	0.684384	0.912228
Olsenellauli	0.685292	0.912228
Enterobacterlignolyticus	0.68543	0.912228
Veillonellasp_oraltaxon780	0.68543	0.912228
Streptococcussp_M143	0.685668	0.912228
Aggregatibactersegnis	0.688723	0.912228
Clostridiumsp_M62_1	0.689326	0.912228
Prevotellamultiformis	0.690052	0.912228
Dorealongicatena	0.698005	0.914815
Bifidobacteriumpseudocatenulatum	0.699931	0.914815
Anaerococcusvaginalis	0.706021	0.914815
Burkholderiaglumae	0.706021	0.914815
Prevotellabryantii	0.706021	0.914815
Haemophilusaegyptius	0.710348	0.914815
Enterobacteraerogenes	0.710357	0.914815
Enterobacterhormaechei	0.723607	0.92505
Neisseriamacacae	0.723607	0.92505
Streptococcusinfantis	0.732075	0.927114
Bacteroideshelcogenes	0.741359	0.927114
Bifidobacteriumanimalis	0.741359	0.927114
Rothiadentocariosa	0.741757	0.927114
Alloprevotellatannerae	0.746778	0.927114
Bulleidiaextructa	0.749129	0.927114
Enterococcuscasseliflavus	0.749129	0.927114
Erysipelotrichaceaebacterium5_2_54FAA	0.749129	0.927114
Lactobacillusrhamnosus	0.749129	0.927114
Cryptobacteriumcurtum	0.753768	0.928845
Bacteroidesplebeius	0.755919	0.928845
Lactobacillusfermentum	0.759324	0.928845
Bifidobacteriumangulatum	0.761174	0.928845
Aeromonascaviae	0.777251	0.939272
Citrobacterrodentium	0.777251	0.939272
Neisseriamucosa	0.777792	0.939272
Streptococcusinfantarius	0.788667	0.945973
Bacteroidessalanitronis	0.79035	0.945973
Enterobactercloacae	0.793872	0.945973
Clostridiumperfringens	0.794184	0.945973
Bacteroidessp_D22	0.801587	0.951544
Neisserialactamica	0.807254	0.955023
Leuconostoclactis	0.813624	0.95555
Selenomonasnoxia	0.813624	0.95555
Bacteroidescaccae	0.819189	0.95555
Streptococcusvestibularis	0.819472	0.95555
Parvimonasmicra	0.82139	0.95555
Clostridiumscindens	0.829564	0.958048
Slackiaexigua	0.834678	0.958048
Bacteroidessp_D2	0.8371	0.958048
Bacteroidessp_3_1_33FAA	0.83717	0.958048
Bacteroidessp_4_1_36	0.837263	0.958048
Paraprevotellaxylaniphila	0.847172	0.964353
Atopobiumparvulum	0.848299	0.964353
Streptococcussp_M334	0.852756	0.965102
Bacteroidessp_D20	0.855132	0.965102
Anaerostipescaccae	0.858177	0.965102
Klebsiellaoxytoca	0.863099	0.965102
Clostridiumsaccharolyticum	0.868031	0.965102
Lachnospiraceaebacterium9_1_43BFAA	0.868031	0.965102
Erysipelotrichaceaebacterium3_1_53	0.868315	0.965102
Bacteroidesuniformis	0.873076	0.967313
Streptococcuscristatus	0.880503	0.972454
Streptococcusconstellatus	0.884141	0.973392
Atopobiumrimae	0.892768	0.979799
Lachnospiraceaebacterium2_1_58FAA	0.906939	0.985283
Lachnoanaerobaculumsaburreum	0.914227	0.985283
Prevotellatimonensis	0.914227	0.985283
Parasutterellaexcrementihominis	0.916552	0.985283
Eubacteriumventriosum	0.918004	0.985283
Oribacteriumsp_oraltaxon108	0.920586	0.985283
Streptococcusparasanguinis	0.927264	0.985283
Clostridialesbacterium1_7_47FAA	0.935483	0.985283
Bacteroidessp_D1	0.937262	0.985283
Finegoldiamagna	0.937262	0.985283
Mitsuokellamultacida	0.937262	0.985283
Oscillibactervalericigenes	0.937262	0.985283
Ruminococcusgnavus	0.944833	0.985283
Granulicatellaelegans	0.947008	0.985283
Lactobacilluscasei	0.947008	0.985283
Streptococcusgallolyticus	0.951141	0.985283
Aeromonashydrophila	0.957051	0.985283
Clostridiumdifficile	0.957051	0.985283
Clostridiumhiranonis	0.957051	0.985283
Lachnospiraceaebacterium6_1_63FAA	0.957051	0.985283
Leptotrichiabuccalis	0.957051	0.985283
Odoribactersplanchnicus	0.963573	0.988015
Ruminococcuslactaris	0.965367	0.988015
Desulfovibriopiger	0.976241	0.996222
Streptococcuspasteurianus	0.989417	1
Holdemaniafiliformis	1	1
Lactobacillusplantarum	1	1
Parvimonassp_oraltaxon110	1	1
Prevotellabivia	1	1
Prevotelladisiens	1	1
Sutterellawadsworthensis	1	1
b. KEGG modules profiles
KEGG-gene based	p_value_kw	p_value_FDR		Uniref90-based	p_value_kw	p_value_FDR
M00253	0.000522575	0.171644		M00063	0.00758179	0.475875
M00657	0.0011924	0.171644		M00319	0.0086756	0.475875
M00701	0.00387564	0.171644		M00436	0.0128618	0.475875
M00603	0.00465626	0.171644		M00657	0.0155586	0.475875
M00207	0.00536506	0.171644		M00445	0.0244208	0.475875
M00196	0.0061699	0.171644		M00475	0.0271938	0.475875
M00439	0.0061699	0.171644		M00500	0.0271938	0.475875
M00656	0.0061699	0.171644		M00589	0.0284597	0.475875
M00063	0.00758179	0.171644		M00254	0.0301535	0.475875
M00199	0.00811312	0.171644		M00149	0.0319331	0.475875
M00696	0.00855109	0.171644		M00064	0.0357638	0.475875
M00491	0.00867753	0.171644		M00207	0.0357638	0.475875
M00149	0.0105871	0.171644		M00274	0.0399796	0.475875
M00210	0.0113021	0.171644		M00550	0.0446097	0.475875
M00320	0.0113021	0.171644		M00323	0.0447792	0.475875
M00255	0.0120596	0.171644		M00605	0.0470895	0.475875
M00816	0.0120596	0.171644		M00258	0.0523978	0.475875
M00669	0.0128618	0.171644		M00723	0.0528329	0.475875
M00670	0.0128618	0.171644		M00048	0.0530738	0.475875
M00305	0.0129868	0.171644		M00193	0.0581975	0.475875
M00214	0.0137108	0.171644		M00198	0.0581975	0.475875
M00554	0.0137108	0.171644		M00581	0.0581975	0.475875
M00605	0.0137108	0.171644		M00452	0.0585718	0.475875
M00522	0.014268	0.171644		M00444	0.0610175	0.475875
M00652	0.0145976	0.171644		M00744	0.0610175	0.475875
M00577	0.014609	0.171644		M00746	0.0610175	0.475875
M00500	0.0153998	0.171644		M00222	0.0612917	0.475875
M00319	0.0154988	0.171644		M00298	0.0612917	0.475875
M00436	0.0155586	0.171644		M00724	0.0635948	0.475875
M00817	0.0155586	0.171644		M00216	0.0645209	0.475875
M00205	0.0165622	0.171644		M00518	0.066109	0.475875
M00298	0.0165622	0.171644		M00213	0.0678812	0.475875
M00606	0.0165622	0.171644		M00283	0.0678891	0.475875
M00200	0.018741	0.184279		M00206	0.0714008	0.475875
M00206	0.0199216	0.184279		M00555	0.0731286	0.475875
M00573	0.0199216	0.184279		M00499	0.0745884	0.475875
M00249	0.0199366	0.184279		M00199	0.0750599	0.475875
M00279	0.0211666	0.18712		M00200	0.0750599	0.475875
M00697	0.0213382	0.18712		M00606	0.0750599	0.475875
M00060	0.0224789	0.187507		M00729	0.0750599	0.475875
M00602	0.0224789	0.187507		M00652	0.076558	0.475875
M00144	0.0238613	0.194299		M00449	0.0765621	0.475875
M00499	0.0249624	0.196781		M00721	0.0786976	0.475875
M00747	0.0253168	0.196781		M00233	0.078862	0.475875
M00589	0.0268486	0.200512		M00196	0.0788707	0.475875
M00533	0.0278197	0.200512		M00210	0.0788707	0.475875
M00123	0.0284597	0.200512		M00239	0.0788707	0.475875
M00198	0.0284597	0.200512		M00711	0.0845653	0.475875
M00153	0.0301535	0.200512		M00456	0.090928	0.475875
M00339	0.0301535	0.200512		M00241	0.091162	0.475875
M00813	0.0301535	0.200512		M00519	0.0957155	0.475875
M00064	0.0319331	0.200512		M00134	0.100309	0.475875
M00172	0.0319331	0.200512		M00230	0.100338	0.475875
M00575	0.0321895	0.200512		M00417	0.100338	0.475875
M00197	0.0338021	0.200512		M00005	0.100348	0.475875
M00125	0.0357638	0.200512		M00446	0.104595	0.475875
M00134	0.0357638	0.200512		M00225	0.105118	0.475875
M00326	0.0357638	0.200512		M00317	0.105118	0.475875
M00571	0.0357638	0.200512		M00267	0.105158	0.475875
M00720	0.0357638	0.200512		M00554	0.105158	0.475875
M00821	0.0357638	0.200512		M00278	0.110046	0.475875
M00497	0.0378162	0.208599		M00491	0.110149	0.475875
M00457	0.0412778	0.222253		M00709	0.115115	0.475875
M00093	0.042241	0.222253		M00603	0.115325	0.475875
M00251	0.042241	0.222253		M00348	0.117973	0.475875
M00283	0.0470895	0.240367		M00767	0.120082	0.475875
M00518	0.0470895	0.240367		M00497	0.120583	0.475875
M00530	0.0496842	0.247865		M00236	0.120691	0.475875
M00762	0.0500078	0.247865		M00270	0.120691	0.475875
M00471	0.0523706	0.254491		M00502	0.121243	0.475875
M00438	0.0528329	0.254491		M00701	0.12614	0.475875
M00194	0.0549879	0.254946		M00447	0.126206	0.475875
M00204	0.0549879	0.254946		M00728	0.126206	0.475875
M00213	0.0551639	0.254946		M00226	0.126239	0.475875
M00446	0.0578944	0.258488		M00212	0.12625	0.475875
M00317	0.0581249	0.258488		M00272	0.12625	0.475875
M00116	0.0581975	0.258488		M00602	0.12625	0.475875
M00450	0.0623162	0.269774		M00486	0.127924	0.475875
M00645	0.0623162	0.269774		M00034	0.132006	0.475875
M00241	0.0632479	0.270385		M00268	0.132006	0.475875
M00230	0.0678892	0.283147		M00331	0.132006	0.475875
M00651	0.0678892	0.283147		M00009	0.137953	0.47767
M00227	0.0713926	0.283903		M00342	0.137953	0.47767
M00348	0.0714008	0.283903		M00740	0.140943	0.47767
M00572	0.0714008	0.283903		M00204	0.144011	0.47767
M00767	0.0748311	0.283903		M00669	0.144127	0.47767
M00232	0.0750599	0.283903		M00670	0.144127	0.47767
M00325	0.0750599	0.283903		M00707	0.149838	0.47767
M00451	0.0763965	0.283903		M00761	0.149838	0.47767
M00474	0.077443	0.283903		M00473	0.150263	0.47767
M00486	0.0778323	0.283903		M00046	0.150499	0.47767
M00449	0.077861	0.283903		M00228	0.150499	0.47767
M00226	0.0781438	0.283903		M00194	0.157071	0.487961
M00300	0.0783861	0.283903		M00266	0.157083	0.487961
M00306	0.078862	0.283903		M00722	0.159424	0.490018
M00473	0.0807823	0.285171		M00022	0.163884	0.498479
M00502	0.0808819	0.285171		M00648	0.170656	0.501204
M00225	0.0820907	0.285551		M00593	0.170904	0.501204
M00417	0.0826596	0.285551		M00443	0.175376	0.501204
M00746	0.0878467	0.289351		M00302	0.179576	0.501204
M00080	0.0891958	0.289351		M00471	0.180608	0.501204
M00721	0.0897109	0.289351		M00300	0.185602	0.501204
M00761	0.0904693	0.289351		M00250	0.185615	0.501204
M00280	0.0912556	0.289351		M00549	0.185615	0.501204
M00331	0.0912556	0.289351		M00192	0.189307	0.501204
M00519	0.0912556	0.289351		M00157	0.193313	0.501204
M00444	0.09222	0.289351		M00234	0.193313	0.501204
M00723	0.09222	0.289351		M00237	0.193313	0.501204
M00744	0.09222	0.289351		M00265	0.193313	0.501204
M00551	0.0943302	0.289688		M00275	0.193313	0.501204
M00648	0.0953797	0.289688		M00632	0.193313	0.501204
M00119	0.0957155	0.289688		M00450	0.196467	0.501204
M00506	0.0957155	0.289688		M00645	0.196467	0.501204
M00233	0.100152	0.296622		M00217	0.19928	0.501204
M00193	0.100348	0.296622		M00144	0.201243	0.501204
M00475	0.102943	0.296622		M00215	0.201243	0.501204
M00192	0.103497	0.296622		M00320	0.201243	0.501204
M00555	0.105057	0.296622		M00697	0.204648	0.501204
M00029	0.105158	0.296622		M00227	0.209394	0.501204
M00266	0.105158	0.296622		M00324	0.209394	0.501204
M00793	0.105158	0.296622		M00050	0.209407	0.501204
M00488	0.107883	0.296622		M00306	0.209407	0.501204
M00323	0.109573	0.296622		M00029	0.217795	0.504652
M00236	0.110149	0.296622		M00176	0.217809	0.504652
M00240	0.110149	0.296622		M00197	0.217809	0.504652
M00346	0.110149	0.296622		M00432	0.217809	0.504652
M00582	0.110149	0.296622		M00477	0.219489	0.504652
M00724	0.112312	0.300084		M00712	0.222055	0.506563
M00009	0.115325	0.305746		M00335	0.22645	0.512585
M00278	0.124934	0.327102		M00530	0.230365	0.512816
M00115	0.12625	0.327102		M00451	0.233113	0.512816
M00274	0.12625	0.327102		M00125	0.235333	0.512816
M00711	0.131995	0.336322		M00238	0.235333	0.512816
M00228	0.132006	0.336322		M00573	0.235333	0.512816
M00477	0.132759	0.336322		M00117	0.244447	0.513543
M00452	0.134011	0.336999		M00727	0.244447	0.513543
M00008	0.136596	0.339451		M00006	0.24446	0.513543
M00117	0.137326	0.339451		M00577	0.24446	0.513543
M00216	0.137964	0.339451		M00747	0.24446	0.513543
M00504	0.143764	0.347123		M00461	0.24988	0.514717
M00247	0.144127	0.347123		M00133	0.253833	0.514717
M00454	0.144127	0.347123		M00208	0.253833	0.514717
M00568	0.146534	0.350452		M00287	0.253833	0.514717
M00259	0.150499	0.352538		M00440	0.253833	0.514717
M00442	0.150499	0.352538		M00572	0.263453	0.53054
M00742	0.150499	0.352538		M00455	0.270627	0.535637
M00712	0.152844	0.355595		M00232	0.272544	0.535637
M00221	0.157083	0.35815		M00124	0.273322	0.535637
M00324	0.157083	0.35815		M00362	0.273322	0.535637
M00440	0.157083	0.35815		M00582	0.28344	0.550306
M00447	0.16364	0.359283		M00219	0.284576	0.550306
M00728	0.16364	0.359283		M00435	0.292634	0.558855
M00191	0.163762	0.359283		M00303	0.293809	0.558855
M00124	0.163884	0.359283		M00545	0.294738	0.558855
M00258	0.163884	0.359283		M00696	0.297912	0.561228
M00590	0.163884	0.359283		M00506	0.30443	0.56983
M00455	0.168505	0.367062		M00247	0.315302	0.577677
M00333	0.170904	0.367604		M00255	0.315302	0.577677
M00593	0.170904	0.367604		M00271	0.315302	0.577677
M00445	0.178146	0.378423		M00357	0.324743	0.577677
M00596	0.178146	0.378423		M00739	0.326413	0.577677
M00220	0.185615	0.387075		M00169	0.326427	0.577677
M00459	0.185615	0.387075		M00220	0.326427	0.577677
M00581	0.185615	0.387075		M00279	0.326427	0.577677
M00709	0.190469	0.3889		M00349	0.326427	0.577677
M00461	0.192094	0.3889		M00166	0.332664	0.585167
M00229	0.193055	0.3889		M00205	0.337803	0.587134
M00435	0.1933	0.3889		M00211	0.337803	0.587134
M00585	0.193313	0.3889		M00017	0.349431	0.6002
M00729	0.193313	0.3889		M00173	0.349431	0.6002
M00600	0.199086	0.398172		M00123	0.36131	0.616975
M00273	0.201243	0.398395		M00251	0.373439	0.633979
M00342	0.201527	0.398395		M00229	0.398429	0.661053
M00495	0.217543	0.421709		M00060	0.398443	0.661053
M00739	0.217676	0.421709		M00240	0.398443	0.661053
M00550	0.217809	0.421709		M00269	0.398443	0.661053
M00166	0.218253	0.421709		M00150	0.411314	0.674739
M00479	0.222523	0.427544		M00188	0.411314	0.674739
M00722	0.225697	0.427878		M00333	0.424428	0.692364
M00234	0.22645	0.427878		M00033	0.438254	0.710945
M00631	0.22645	0.427878		M00488	0.44921	0.712446
M00302	0.230317	0.43252		M00708	0.451117	0.712446
M00472	0.231436	0.43252		M00016	0.451379	0.712446
M00456	0.234859	0.435049		M00280	0.451379	0.712446
M00211	0.235333	0.435049		M00429	0.451379	0.712446
M00483	0.238393	0.438335		M00003	0.461193	0.714017
M00807	0.244406	0.446988		M00191	0.46508	0.714017
M00002	0.253833	0.454507		M00153	0.465209	0.714017
M00208	0.253833	0.454507		M00209	0.465209	0.714017
M00250	0.253833	0.454507		M00585	0.465209	0.714017
M00580	0.253833	0.454507		M00190	0.479271	0.714017
M00215	0.263453	0.466844		M00325	0.479271	0.714017
M00267	0.263453	0.466844		M00326	0.479271	0.714017
M00254	0.273322	0.479364		M00571	0.479271	0.714017
M00822	0.273322	0.479364		M00720	0.479271	0.714017
M00583	0.288722	0.503791		M00821	0.479271	0.714017
M00632	0.293809	0.508528		M00479	0.491131	0.72788
M00545	0.294712	0.508528		M00307	0.493563	0.72788
M00443	0.295898	0.508528		M00339	0.508079	0.741796
M00136	0.298813	0.510368		M00361	0.508079	0.741796
M00453	0.30429	0.510368		M00221	0.522817	0.755755
M00016	0.30443	0.510368		M00525	0.522817	0.755755
M00271	0.30443	0.510368		M00008	0.537724	0.76975
M00334	0.30443	0.510368		M00273	0.537771	0.76975
M00727	0.315163	0.523407		M00631	0.552936	0.785685
M00308	0.315302	0.523407		M00140	0.568309	0.785685
M00332	0.316799	0.523407		M00442	0.568309	0.785685
M00003	0.323338	0.526594		M00668	0.571762	0.785685
M00344	0.325937	0.526594		M00088	0.582571	0.785685
M00005	0.326427	0.526594		M00646	0.583774	0.785685
M00242	0.326427	0.526594		M00743	0.583872	0.785685
M00707	0.326427	0.526594		M00119	0.583882	0.785685
M00150	0.337803	0.542389		M00202	0.583882	0.785685
M00275	0.349431	0.553266		M00246	0.583882	0.785685
M00349	0.349431	0.553266		M00260	0.583882	0.785685
M00525	0.349431	0.553266		M00374	0.583882	0.785685
M00237	0.36131	0.566826		M00596	0.583882	0.785685
M00432	0.36131	0.566826		M00580	0.59084	0.791401
M00269	0.373439	0.577902		M00282	0.599652	0.795902
M00549	0.373439	0.577902		M00620	0.599652	0.795902
M00627	0.373439	0.577902		M00365	0.615571	0.798928
M00307	0.385817	0.594367		M00116	0.615612	0.798928
M00458	0.396437	0.595054		M00454	0.615612	0.798928
M00565	0.396763	0.595054		M00627	0.615612	0.798928
M00061	0.398443	0.595054		M00806	0.615612	0.798928
M00268	0.398443	0.595054		M00172	0.628115	0.802055
M00299	0.398443	0.595054		M00459	0.631746	0.802055
M00535	0.398443	0.595054		M00045	0.631756	0.802055
M00743	0.398443	0.595054		M00245	0.631756	0.802055
M00668	0.400185	0.595058		M00259	0.631756	0.802055
M00034	0.411314	0.608958		M00019	0.648077	0.808711
M00157	0.424428	0.620318		M00026	0.648077	0.808711
M00527	0.424428	0.620318		M00095	0.648077	0.808711
M00620	0.424428	0.620318		M00570	0.648077	0.808711
M00503	0.430311	0.625087		M00223	0.664569	0.815354
M00345	0.431346	0.625087		M00308	0.664569	0.815354
M00140	0.437784	0.630063		M00439	0.664569	0.815354
M00708	0.438465	0.630063		M00742	0.664569	0.815354
M00120	0.451366	0.645887		M00080	0.675777	0.825635
M00186	0.465157	0.660172		M00242	0.681225	0.828824
M00246	0.465209	0.660172		M00394	0.698038	0.842261
M00628	0.474925	0.671175		M00552	0.698038	0.842261
M00209	0.479271	0.671766		M00011	0.715001	0.8487
M00335	0.479271	0.671766		M00096	0.715001	0.8487
M00448	0.492862	0.683395		M00527	0.715001	0.8487
M00026	0.493563	0.683395		M00793	0.715001	0.8487
M00360	0.493563	0.683395		M00495	0.732098	0.861995
M00265	0.508079	0.700658		M00051	0.732105	0.861995
M00023	0.522817	0.715213		M00453	0.749204	0.871746
M00281	0.522817	0.715213		M00093	0.749344	0.871746
M00179	0.537771	0.729831		M00526	0.749344	0.871746
M00238	0.537771	0.729831		M00468	0.766577	0.881413
M00095	0.55289	0.735814		M00020	0.766709	0.881413
M00022	0.552936	0.735814		M00023	0.766709	0.881413
M00222	0.552936	0.735814		M00002	0.784191	0.894468
M00223	0.552936	0.735814		M00189	0.784191	0.894468
M00245	0.552936	0.735814		M00061	0.819477	0.916809
M00217	0.5602	0.741838		M00159	0.819477	0.916809
M00017	0.568309	0.741838		M00214	0.819477	0.916809
M00088	0.568309	0.741838		M00256	0.819477	0.916809
M00359	0.568309	0.741838		M00764	0.819477	0.916809
M00764	0.568309	0.741838		M00481	0.837244	0.9191
M00586	0.575684	0.748328		M00754	0.837244	0.9191
M00468	0.577657	0.748328		M00318	0.837258	0.9191
M00330	0.583272	0.750706		M00359	0.837263	0.9191
M00552	0.583882	0.750706		M00377	0.837263	0.9191
M00045	0.615612	0.785594		M00635	0.846144	0.92481
M00212	0.615612	0.785594		M00136	0.855098	0.92481
M00365	0.62331	0.79246		M00121	0.855132	0.92481
M00011	0.631756	0.800224		M00276	0.855132	0.92481
M00361	0.648077	0.817868		M00115	0.873076	0.93384
M00239	0.664569	0.827606		M00244	0.873076	0.93384
M00526	0.664569	0.827606		M00651	0.873076	0.93384
M00649	0.665473	0.827606		M00281	0.891054	0.949591
M00655	0.665473	0.827606		M00492	0.900083	0.951513
M00121	0.681225	0.832068		M00175	0.909151	0.951513
M00178	0.681225	0.832068		M00178	0.909151	0.951513
M00188	0.681225	0.832068		M00179	0.909151	0.951513
M00303	0.681225	0.832068		M00183	0.909151	0.951513
M00394	0.681225	0.832068		M00344	0.914876	0.954085
M00490	0.691029	0.837432		M00122	0.927264	0.963563
M00051	0.698038	0.837432		M00346	0.944833	0.978337
M00529	0.700686	0.837432		M00472	0.963573	0.98381
M00601	0.714558	0.837432		M00299	0.963594	0.98381
M00033	0.714969	0.837432		M00360	0.963594	0.98381
M00020	0.715001	0.837432		M00535	0.963594	0.98381
M00185	0.715001	0.837432		M00345	0.972463	0.988563
M00189	0.715001	0.837432		M00521	0.981787	0.988563
M00190	0.715001	0.837432		M00706	0.981792	0.988563
M00219	0.715001	0.837432		M00120	0.981792	0.988563
M00287	0.715001	0.837432		M00185	1	1
M00362	0.715001	0.837432		M00277	1	1
M00514	0.727835	0.849555
M00183	0.732105	0.851632
M00032	0.746778	0.859985
M00176	0.749344	0.859985
M00610	0.749344	0.859985
M00809	0.749344	0.859985
M00356	0.766156	0.862547
M00635	0.766156	0.862547
M00019	0.766708	0.862547
M00276	0.766708	0.862547
M00429	0.766708	0.862547
M00570	0.766708	0.862547
M00318	0.77018	0.863611
M00715	0.781665	0.86514
M00400	0.783457	0.86514
M00403	0.783457	0.86514
M00046	0.784191	0.86514
M00377	0.784191	0.86514
M00224	0.792534	0.871532
M00006	0.801784	0.87328
M00260	0.801784	0.87328
M00374	0.801784	0.87328
M00521	0.810165	0.879608
M00496	0.817992	0.883911
M00646	0.819297	0.883911
M00740	0.836872	0.89763
M00050	0.837263	0.89763
M00481	0.855049	0.899862
M00754	0.855049	0.899862
M00175	0.855132	0.899862
M00277	0.855132	0.899862
M00492	0.855132	0.899862
M00706	0.855132	0.899862
M00169	0.873076	0.915926
M00357	0.891086	0.931961
M00122	0.909151	0.945075
M00159	0.909151	0.945075
M00014	0.913922	0.94664
M00231	0.92661	0.94664
M00244	0.927264	0.94664
M00270	0.927264	0.94664
M00272	0.927264	0.94664
M00806	0.927264	0.94664
M00256	0.945415	0.962298
M00082	0.957051	0.971251
M00791	0.963535	0.974938
M00096	0.981792	0.984672
M00173	0.981792	0.984672
M00202	0.981792	0.984672
M00133	1	1
c. Metabolome profiles
Metaboloites	p_value_kw	p_value_FDR
C00003_NAD_	0.00280147	0.65186
C00008_ADP	0.00406143	0.65186
C00015_UDP	0.00896655	0.745331
C00019_SAM_	0.0104545	0.745331
C00020_AMP	0.0147684	0.745331
C00021_SAH	0.0159005	0.745331
C00024_AcetylCoA	0.0184537	0.745331
C00025_Glu	0.0390118	0.745331
C00029_UDP_glucose	0.0390118	0.745331
C00037_Gly	0.0390118	0.745331
C00041_Ala	0.0390118	0.745331
C00042_Succinate	0.0431109	0.745331
C00043_UDP_N_acetylglucosamine	0.0447582	0.745331
C00044_GTP	0.0447582	0.745331
C00047_Lys	0.0450211	0.745331
C00049_Asp	0.0512756	0.745331
C00051_Glutathione_red_	0.0533258	0.745331
C00055_CMP	0.0585692	0.745331
C00062_Arg	0.0666534	0.745331
C00064_Gln	0.0714779	0.745331
C00065_Ser	0.0749794	0.745331
C00073_Met	0.0756204	0.745331
C00074_PEP	0.0757482	0.745331
C00077_Ornithine	0.080632	0.745331
C00078_Trp	0.080632	0.745331
C00079_Phe	0.0834593	0.745331
C00082_Tyr	0.0866991	0.745331
C00085_F6P	0.0882848	0.745331
C00086_Urea	0.10243	0.745331
C00092_G6P	0.10278	0.745331
C00093_Glycerophosphate	0.112222	0.745331
C00099_beta_Ala	0.120264	0.745331
C00103_G1P	0.125545	0.745331
C00105_UMP	0.136977	0.745331
C00106_Uracil	0.138641	0.745331
C00114_Choline	0.142327	0.745331
C00116_Glycerol	0.142327	0.745331
C00120_Biotin	0.148572	0.745331
C00122_Fumarate	0.148769	0.745331
C00123_Leu	0.149318	0.745331
C00127_Glutathione_ox_	0.149318	0.745331
C00134_Putrescine_1_4_Butanediamine_	0.149318	0.745331
C00135_His	0.149318	0.745331
C00140_N_Acetylglucosamine	0.149541	0.745331
C00147_Adenine	0.149541	0.745331
C00148_Pro	0.149541	0.745331
C00152_Asn	0.149541	0.745331
C00153_Nicotinamide	0.149541	0.745331
C00156_p_Hydroxybenzoate	0.149541	0.745331
C00158_Citrate	0.149541	0.745331
C00163_Propionate	0.149541	0.745331
C00170_5_Methylthioadenosine	0.149541	0.745331
C00178_Thymine	0.149541	0.745331
C00179_Agmatine	0.149541	0.745331
C00183_Val	0.149541	0.745331
C00186_Lactate	0.149541	0.745331
C00188_Thr	0.149541	0.745331
C00191_Glucuronate	0.151361	0.745331
C00197_3PG	0.152093	0.745331
C00199_Ru5P	0.164751	0.745331
C00212_Adenosine	0.16576	0.745331
C00213_Sarcosine	0.166994	0.745331
C00214_Thymidine	0.166994	0.745331
C00233_4_Methyl_2_oxopentanoate	0.175985	0.745331
C00242_Guanine	0.17935	0.745331
C00245_Taurine	0.182967	0.745331
C00246_Butyrate	0.182967	0.745331
C00250_Pyridoxal	0.183584	0.745331
C00253_Nicotinate	0.187529	0.745331
C00255_Riboflavin	0.188886	0.745331
C00257_Gluconate	0.188886	0.745331
C00258_Glycerate	0.188886	0.745331
C00262_Hypoxanthine	0.188886	0.745331
C00263_Homoserine	0.192641	0.745331
C00270_N_Acetylneuraminate	0.194087	0.745331
C00294_Inosine	0.19497	0.745331
C00295_Orotate	0.19497	0.745331
C00296_Quinate	0.19497	0.745331
C00299_Uridine	0.19497	0.745331
C00300_Creatine	0.197759	0.745331
C00311_Isocitrate	0.199736	0.745331
C00314_Pyridoxine	0.204762	0.745331
C00315_Spermidine	0.209069	0.745331
C00318_Carnitine	0.209069	0.745331
C00327_Citrulline	0.217652	0.745331
C00329_Glucosamine	0.217652	0.745331
C00330_2_Deoxyguanosine	0.217652	0.745331
C00334_GABA	0.217652	0.745331
C00346_Ethanolaminephosphate	0.217652	0.745331
C00355_DOPA	0.217652	0.745331
C00357_N_Acetylglucosamine6_phosphate	0.217652	0.745331
C00364_dTMP	0.217652	0.745331
C00366_Urate	0.217652	0.745331
C00371_trans_Zeatin	0.218259	0.745331
C00378_Thiamine	0.226262	0.764528
C00380_Cytosine	0.230528	0.770828
C00383_Malonate	0.235667	0.773094
C00385_Xanthine	0.242114	0.773094
C00386_Carnosine	0.24218	0.773094
C00387_Guanosine	0.250327	0.773094
C00388_Histamine	0.254027	0.773094
C00398_Tryptamine	0.254027	0.773094
C00407_Ile	0.254027	0.773094
C00408_Pipecolate	0.261855	0.773094
C00417_cis_Aconitate	0.264357	0.773094
C00423_trans_Cinnamate	0.266247	0.773094
C00429_Dihydrouracil	0.266247	0.773094
C00430_5_Aminolevulinate	0.270822	0.773094
C00431_5_Aminovalerate	0.277491	0.773094
C00437_N_Acetylornithine	0.278866	0.773094
C00438_Carbamoylaspartate	0.278866	0.773094
C00440_5_Methyltetrahydrofolate	0.283512	0.773094
C00449_Saccharopine	0.28543	0.773094
C00475_Cytidine	0.289953	0.773094
C00482_Sinapate	0.291886	0.773094
C00483_Tyramine	0.295684	0.773094
C00489_Glutarate	0.296696	0.773094
C00491_Cystine	0.296741	0.773094
C00493_Shikimate	0.298524	0.773094
C00506_Cysteate	0.305285	0.773094
C00519_Hypotaurine	0.311575	0.773094
C00534_Pyridoxamine	0.314298	0.773094
C00547_Noradrenaline	0.316394	0.773094
C00568_p_Aminobenzoate	0.319133	0.773094
C00571_Cyclohexylamine	0.320316	0.773094
C00576_Betainealdehyde	0.320316	0.773094
C00581_Guanidinoacetate	0.320316	0.773094
C00587_m_Hydroxybenzoate	0.320316	0.773094
C00588_Phosphorylcholine	0.320316	0.773094
C00612_N1_Acetylspermidine	0.320316	0.773094
C00624_N_Acetylglutamate	0.320316	0.773094
C00628_2_5_Dihydroxybenzoate	0.320316	0.773094
C00630_IsobutyrylCoA	0.320316	0.773094
C00631_2PG	0.325565	0.779898
C00637_Indole_3_acetaldehyde	0.330909	0.781089
C00642_p_Hydroxyphenylacetate	0.333362	0.781089
C00647_Pyridoxamine5_phosphate	0.333362	0.781089
C00670_Glycerophosphorylcholine	0.343863	0.799854
C00695_Cholate	0.347994	0.803641
C00711_Malate	0.351349	0.805592
C00715_Pterin	0.356495	0.811595
C00719_Betaine	0.362577	0.816463
C00729_Tropine	0.36372	0.816463
C00750_Spermine	0.378372	0.831246
C00780_Serotonin	0.378462	0.831246
C00785_Urocanate	0.388456	0.831246
C00791_Creatinine	0.390596	0.831246
C00803_Pentanoate	0.391614	0.831246
C00805_o_Hydroxybenzoate	0.394293	0.831246
C00818_Saccharate	0.410519	0.831246
C00835_Sepiapterin	0.416018	0.831246
C00847_4_Pyridoxate	0.416018	0.831246
C00860_Histidinol	0.418203	0.831246
C00864_Pantothenate	0.420026	0.831246
C00879_Mucate	0.422305	0.831246
C00881_2_Deoxycytidine	0.425218	0.831246
C00884_Homocarnosine	0.4267	0.831246
C00931_Porphobilinogen	0.437495	0.831246
C00942_cGMP	0.437495	0.831246
C00954_Indole_3_acetate	0.437495	0.831246
C00955_Indole_3_ethanol	0.439375	0.831246
C00956_alpha_Aminoadipate	0.443158	0.831246
C00979_O_Acetylserine	0.44405	0.831246
C00986_1_3_Diaminopropane	0.44405	0.831246
C00993_Ala_Ala	0.455795	0.831246
C01004_Trigonelline	0.460617	0.831246
C01005_O_Phosphoserine	0.464669	0.831246
C01008_Trimethylsulfonium	0.466214	0.831246
C01013_3_Hydroxypropionate	0.470927	0.831246
C01015_Hydroxyproline	0.470927	0.831246
C01020_6_Hydroxynicotinate	0.470927	0.831246
C01026_N_N_Dimethylglycine	0.470927	0.831246
C01029_N8_Acetylspermidine	0.473832	0.831246
C01035_gamma_Guanidinobutyrate	0.476533	0.831246
C01042_N_Acetylaspartate	0.47664	0.831246
C01046_N_Methylglutamate	0.477752	0.831246
C01047_N_gamma_Ethylglutamine	0.487752	0.831246
C01073_N_Acetyl_beta_alanine	0.487752	0.831246
C01081_Thiaminemonophosphate	0.487752	0.831246
C01089_3_Hydroxybutyrate	0.487752	0.831246
C01096_Sorbitol6_phosphate	0.487752	0.831246
C01104_TrimethylamineN_oxide	0.487752	0.831246
C01118_o_Succinylhomoserine	0.487752	0.831246
C01152_3_Methylhistidine	0.487752	0.831246
C01181_gamma_Butyrobetaine	0.489519	0.831246
C01198_3__2_Hydroxyphenyl_propionate	0.489886	0.831246
C01234_1_Aminocyclopropane_1_carboxylate	0.496007	0.831246
C01262_Anserine	0.497518	0.831246
C01425_Glu_Glu	0.498679	0.831246
C01551_Allantoin	0.501907	0.831246
C01571_Decanoate	0.505723	0.831246
C01585_Hexanoate	0.505723	0.831246
C01586_Hippurate	0.505723	0.831246
C01598_Melatonin	0.506932	0.831246
C01601_Pelargonate	0.508443	0.831246
C01606_Phthalate	0.508543	0.831246
C01620_Threonate	0.510142	0.831246
C01672_Cadaverine	0.518237	0.840172
C01736_Purineriboside	0.522172	0.842298
C01744_3__4_Hydroxyphenyl_propionate	0.534701	0.858195
C01762_Xanthosine	0.566407	0.878958
C01879_5_Oxoproline	0.566407	0.878958
C01921_Glycocholate	0.566407	0.878958
C01930_Lysinamide	0.566913	0.878958
C01959_Taurocyamine	0.573372	0.878958
C01987_2_Aminophenol	0.574967	0.878958
C01996_Acetylcholine	0.575928	0.878958
C02037_Gly_Gly	0.580878	0.878958
C02043_Indolelactate	0.585754	0.878958
C02115_Alpha_Methylserine	0.590864	0.878958
C02155_Gly_Leu	0.591076	0.878958
C02226_Citraconate	0.592845	0.878958
C02230_3_Methylguanine	0.593192	0.878958
C02242_7_Methylguanine	0.596556	0.878958
C02256_Castanospermine	0.599774	0.878958
C02273_Digalacturonate	0.613254	0.878958
C02356_2AB	0.61332	0.878958
C02376_5_Methylcytosine	0.619257	0.878958
C02378_6_Aminohexanoate	0.619257	0.878958
C02494_1_Methyladenosine	0.619257	0.878958
C02504_2_Isopropylmalate	0.619257	0.878958
C02567_N1_Acetylspermine	0.619257	0.878958
C02567_N1_Acetylspermine_div	0.619257	0.878958
C02571_o_Acetylcarnitine	0.619257	0.878958
C02614_Citramalate	0.619257	0.878958
C02627_2_Deoxystreptamine	0.619257	0.878958
C02630_2_Hydroxyglutarate	0.621568	0.878958
C02640_Isoamylamine	0.633426	0.888349
C02656_Pimelate	0.633745	0.888349
C02678_Dodecanedioate	0.639503	0.890165
C02679_Dodecanoate	0.647096	0.890165
C02693_Indole_3_acetamide	0.647096	0.890165
C02703_SerineO_sulfate	0.649622	0.890165
C02704_Methylsulfate	0.653172	0.890165
C02710_N_Acetylleucine	0.653921	0.890165
C02712_N_Acetylmethionine	0.654452	0.890165
C02713_N_Acetylmuramate	0.659435	0.892254
C02714_N_Acetylputrescine	0.669277	0.892254
C02721_N_Methylalanine	0.67745	0.892254
C02727_N_epsilon_Acetyllysine	0.67745	0.892254
C02735_Phenylethanolamine	0.67745	0.892254
C02787_Isobutylamine	0.67745	0.892254
C02835_Imidazole_4_acetate	0.67745	0.892254
C02890_Tetrahydropalmatine	0.679962	0.892254
C02918_1_Methylnicotinamide	0.681004	0.892254
C02953_7_8_Dihydrobiopterin	0.694596	0.90325
C02989_Methioninesulfoxide	0.695024	0.90325
C02997_N_Acetylhistidine	0.702533	0.90437
C03139_Guanidinosuccinate	0.704338	0.90437
C03172_S_Methylmethionine	0.704338	0.90437
C03264_2_Hydroxy_4_methylpentanoate	0.710935	0.907972
C03283_2_4_Diaminobutyrate	0.715629	0.907972
C03375_Bis_3_aminopropyl_amine	0.715629	0.907972
C03406_Argininosuccinate	0.719577	0.909386
C03413_N1_N12_Diacetylspermine	0.731443	0.918483
C03519_N_Acetylphenylalanine	0.739168	0.918483
C03570_Mannosamine	0.739829	0.918483
C03592_5_Methyl_2_deoxycytidine	0.742696	0.918483
C03626_ADMA	0.743668	0.918483
C03678_4_Amino_3_hydroxybutyrate	0.743942	0.918483
C03722_2_3_Pyridinedicarboxylate	0.752393	0.925357
C03752_Glucosaminate	0.77687	0.940947
C03758_Dopamine	0.783833	0.940947
C03761_3_Hydroxy_3_methylglutarate	0.785083	0.940947
C03793_N6_N6_N6_Trimethyllysine	0.788208	0.940947
C03795_N6_Methyl_2_deoxyadenosine	0.788208	0.940947
C03958_TRH	0.789356	0.940947
C04037_Galacturonate1_phosphate	0.793042	0.940947
C04137_Octopine	0.795071	0.940947
C04259_N_alpha_N_alpha_Dimethylhistidine	0.795071	0.940947
C04294_4_Methyl_5_thiazoleethanol	0.798398	0.940947
C04483_DCA	0.802922	0.940947
C04501_N_Acetylglucosamine1_phosphate	0.8031	0.940947
C04548_Synephrine	0.805052	0.940947
C04677_AICAR	0.806108	0.940947
C05122_Taurocholate	0.816594	0.948102
C05123_Isethionate	0.820183	0.948102
C05127_1_Methylhistamine	0.821098	0.948102
C05135_4__beta_Acetylaminoethyl_imidazole	0.828509	0.949853
C05145_3_Aminoisobutyrate	0.828532	0.949853
C05198_5_Deoxyadenosine	0.844887	0.965156
C05332_Phenethylamine	0.858646	0.969289
C05341_beta_Ala_Lys	0.858955	0.969289
C05382_S7P	0.859938	0.969289
C05562_4_Hydroxymethylimidazole	0.860584	0.969289
C05568_beta_Imidazolelactate	0.863668	0.969361
C05582_Homovanillate	0.873751	0.973934
C05584_4_Hydroxy_3_methoxymandelate	0.87381	0.973934
C05587_3_Methoxytyramine	0.890071	0.983979
C05598_Phenaceturate	0.896514	0.983979
C05607_3_Phenyllactate	0.89661	0.983979
C05629_3_Phenylpropionate	0.907469	0.983979
C05635_5_Hydroxyindoleacetate	0.90804	0.983979
C05659_5_Methoxytryptamine	0.914901	0.983979
C05660_5_Methoxyindoleacetate	0.917707	0.983979
C05771_Isopropanolamine	0.917728	0.983979
C05824_CysteineS_sulfate	0.919497	0.983979
C05984_2_Hydroxybutyrate	0.921357	0.983979
C06057_3_Aminopropane_1_2_diol	0.92445	0.983979
C06103_6_Hydroxyhexanoate	0.92445	0.983979
C06104_Adipate	0.92594	0.983979
C06231_Ectoine	0.941663	0.983979
C06337_Terephthalate	0.942396	0.983979
C06369_2_Deoxyglucose6_phosphate	0.952765	0.983979
C06423_Octanoate	0.959446	0.983979
C06524_Nornicotine	0.96293	0.983979
C06772_Diethanolamine	0.96293	0.983979
C07044_Hydroxyurea	0.96293	0.983979
C07151_Metformin	0.965451	0.983979
C08261_Azelate	0.965451	0.983979
C08262_3_Methylbutanoate	0.971586	0.983979
C08269_Betonicine	0.974783	0.983979
C08277_Sebacate	0.974783	0.983979
C08306_Hexylamine	0.974783	0.983979
C09209_Harman	0.974783	0.983979
C09815_Benzamide	0.974783	0.983979
C10172_Prolinebetaine	0.974783	0.983979
C10833_Syringate	0.974783	0.983979
C11003_2_4_Dimethylaniline	0.986752	0.991479
C11118_1_Methyl_2_pyrrolidinone	0.98839	0.991479
C11284_3_Indolebutyrate	1	1
